# Supplementary material for: Unveiling efficient S-scheme charge carrier transfer in hierarchical BiOBr/TiO2 heterojunction photocatalysts
Source: Royal Society of Chemistry journal article supplement (doi:10.1039/d4nr02640c), 2024-01-01
Supplement: d4nr02640c1.pdf [file d4nr02640c1.pdf]

## Supporting Information

# Unveiling the Efficient S-scheme Charge Carrier Transfer in Hierarchical BiOBr/TiO<sub>2</sub> Heterojunction Photocatalysts

*Pooja P. Sarngan<sup>1</sup>, Sheethal Sasi<sup>2</sup>, Prateekshita Mukherjee<sup>3</sup>, Koushik Mitra<sup>4</sup>, Yuvaraj  
Sivalingam<sup>2,5</sup>, Anita Swami<sup>3</sup>, Uttam Kumar Ghorai<sup>4</sup>, Debabrata Sarkar<sup>1\*</sup>*

<sup>1</sup>Applied NanoPhysics Laboratory, Department of Physics and Nanotechnology, SRM  
Institute of Science and Technology, Kattankulathur – 603203, India.

<sup>2</sup>Laboratory of Sensors, Energy, and Electronic Devices (Lab SEED), Department of Physics  
and Nanotechnology, SRM Institute of Science and Technology, Kattankulathur, Tamil Nadu  
603203, India.

<sup>3</sup>Department of Chemistry, SRM Institute of Science and Technology, Kattankulathur, Tamil  
Nadu 603203, India.

<sup>4</sup>Department of Industrial Chemistry & Applied Chemistry, Swami Vivekananda Research  
Centre, Ramakrishna Mission Vidyamandira, Belur Math, Howrah 711202, India.

<sup>5</sup>Sensors Lab, Computer, Electrical, and Mathematical Sciences and Engineering Division  
(CEMSE), King Abdullah University of Science and Technology (KAUST), Thuwal, 23955-  
6900, Kingdom of Saudi Arabia.

\*Email address for correspondence: [deboo\\_phy@yahoo.com](mailto:deboo_phy@yahoo.com)

**Table S1.** Represents the weight fraction of anatase and rutile in TNF and BTNF heterojunction samples.

| Sample Code         | Anatase % | Rutile % |
|---------------------|-----------|----------|
| TNF                 | 68.03     | 31.96    |
| BTNF <sub>0.5</sub> | 73.73     | 26.26    |
| BTNF <sub>1.0</sub> | 77.28     | 22.71    |
| BTNF <sub>1.5</sub> | 91.70     | 8.29     |
| BTNF <sub>2.0</sub> | 88.29     | 11.70    |

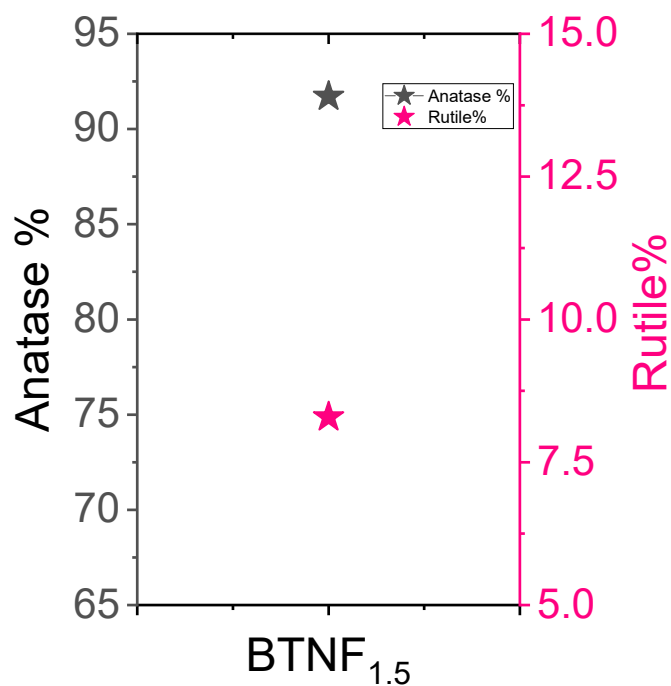

**Fig. S1** Represents the Anatase-Rutile weight % of BTNF<sub>1.5</sub>.

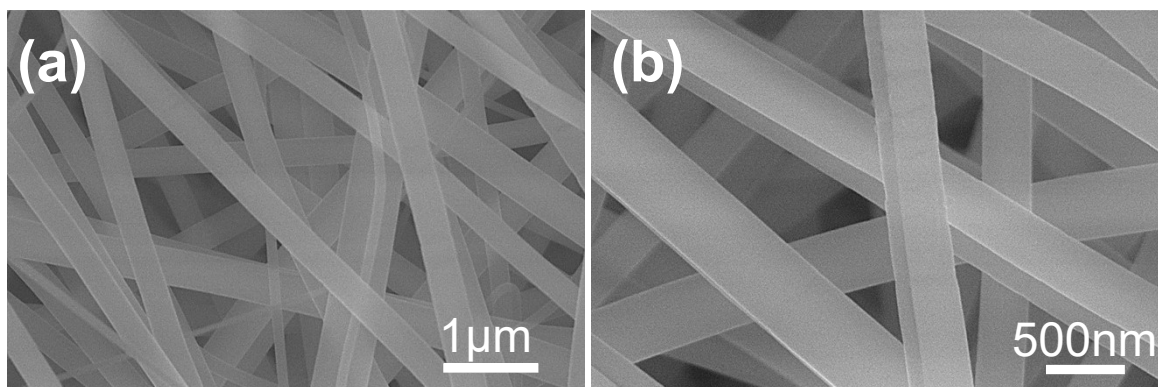

**Fig. S2** (a) Low Resolution and (b) High Resolution images for as-fabricated Titania nanofiber mat

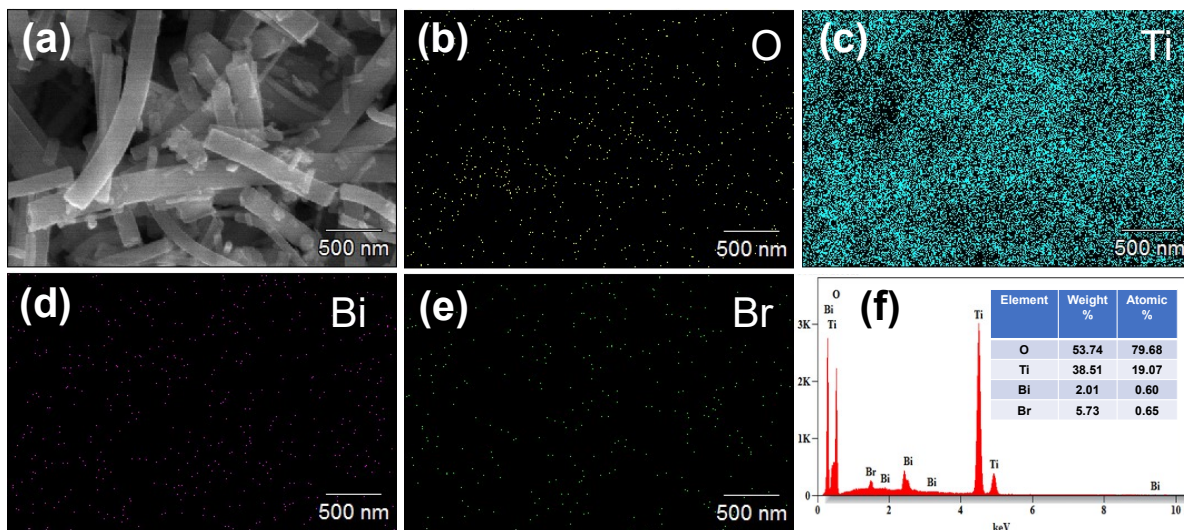

**Fig. S3** (a) Morphology of  $BTNF_{0.5}$  (b-e) Elemental Mapping of  $BTNF_{0.5}$  (f) corresponding EDAX spectra

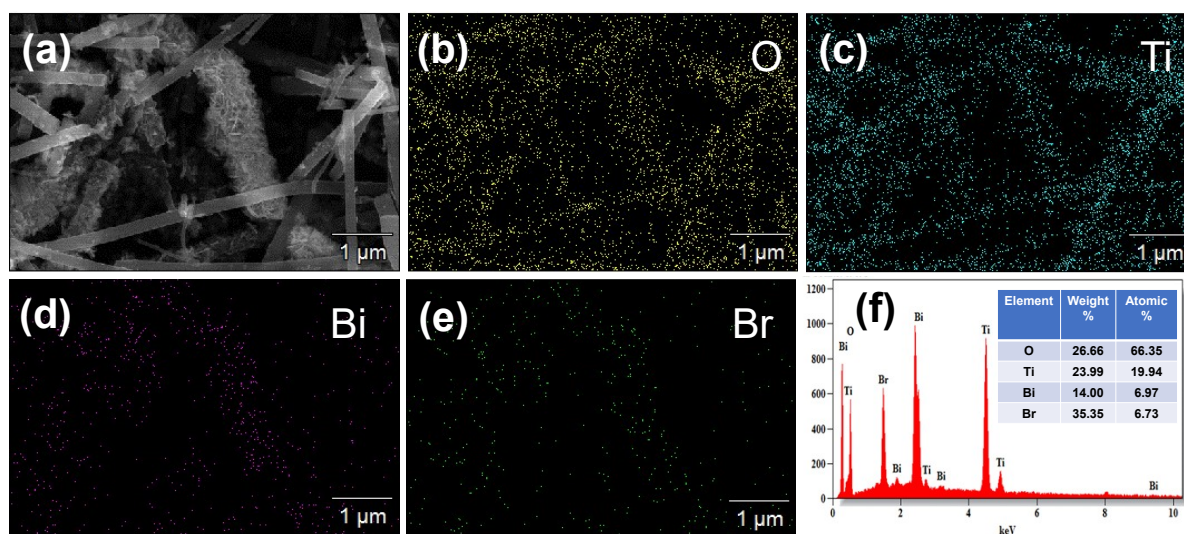

**Fig. S4** (a) Morphology of  $BTNF_{1.0}$  (b-e) Elemental Mapping of  $BTNF_{1.0}$  (f) corresponding EDAX spectra

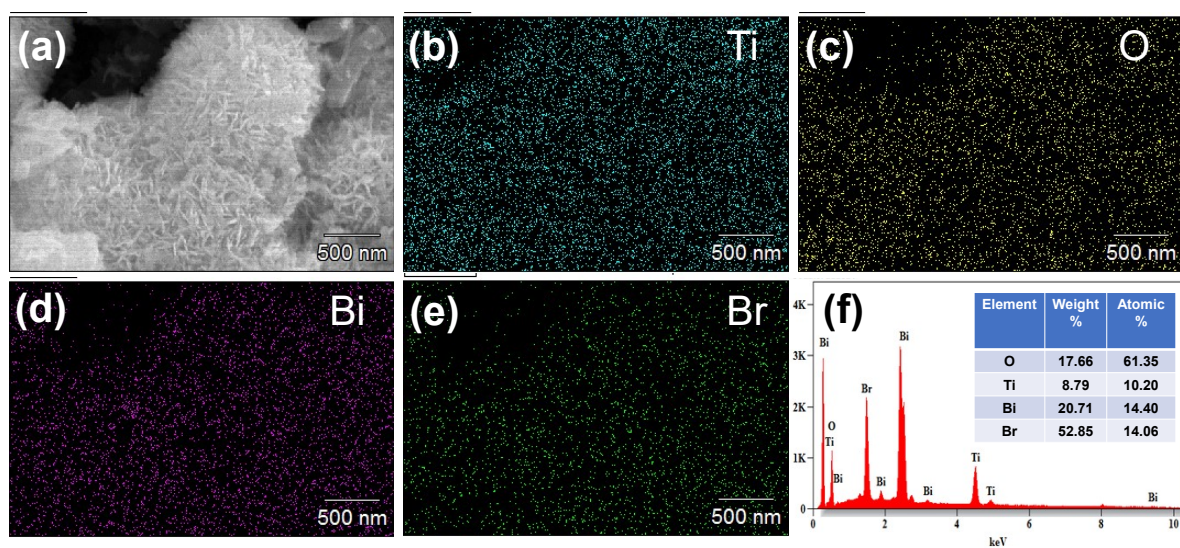

**Fig. S5** (a) Morphology of  $BTNF_{2.0}$  (b-e) Elemental Mapping of  $BTNF_{2.0}$  (f) corresponding EDAX spectra

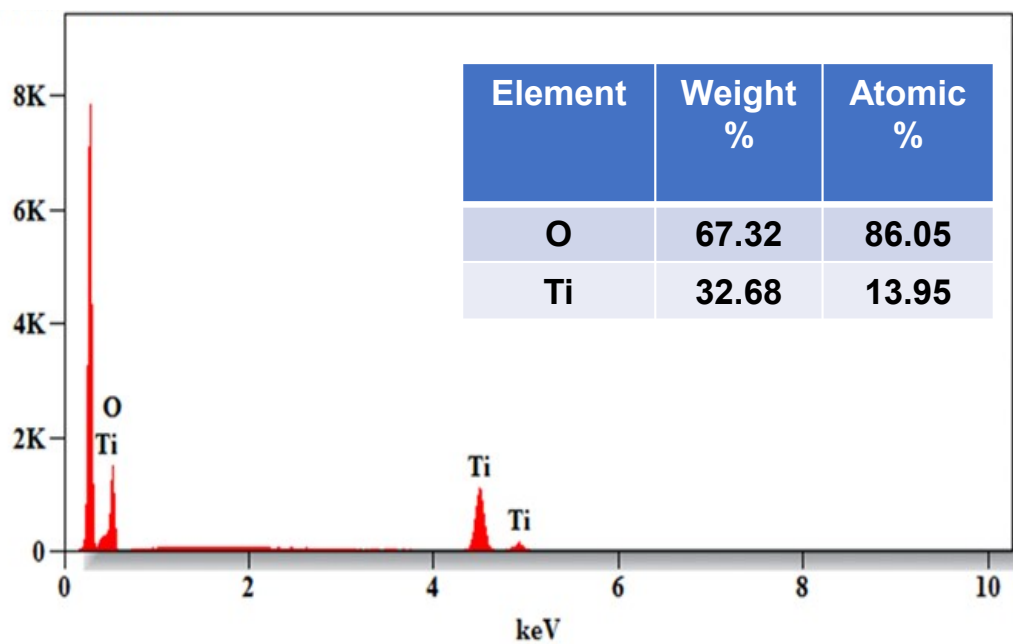

**Fig. S6** EDAX analysis of TNF sample

**Table S2.** Represents the quantitative elemental analysis in TNF and BTNF heterojunction sample.

| Sample Code         | Ti    | O     | Br    | Bi    | Total (Ti, Bi, Br) |
|---------------------|-------|-------|-------|-------|--------------------|
| TNF                 | 67.32 | 32.68 | 0     | 0     | 67.32              |
| BTNF <sub>0.5</sub> | 53.74 | 38.51 | 2.01  | 5.73  | 61.48              |
| BTNF <sub>1.0</sub> | 26.66 | 23.99 | 14    | 35.35 | 76.01              |
| BTNF <sub>1.5</sub> | 22.57 | 14.07 | 18.94 | 44.42 | 85.93              |
| BTNF <sub>2.0</sub> | 17.66 | 8.79  | 20.71 | 52.85 | 91.22              |

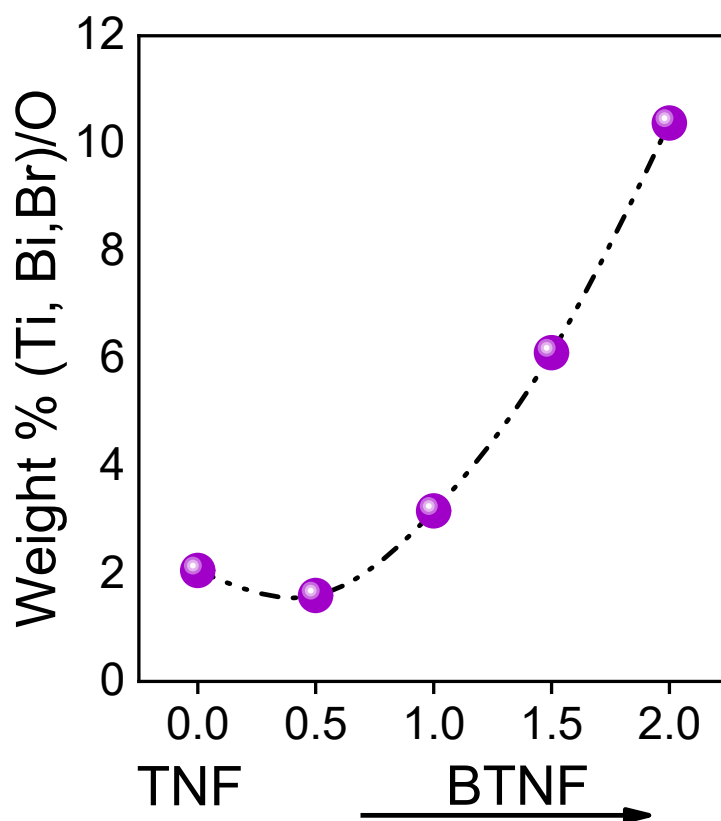

**Fig. S7** Denotes the weight % of sum of Ti, Bi and Br elements with respect to Oxygen.

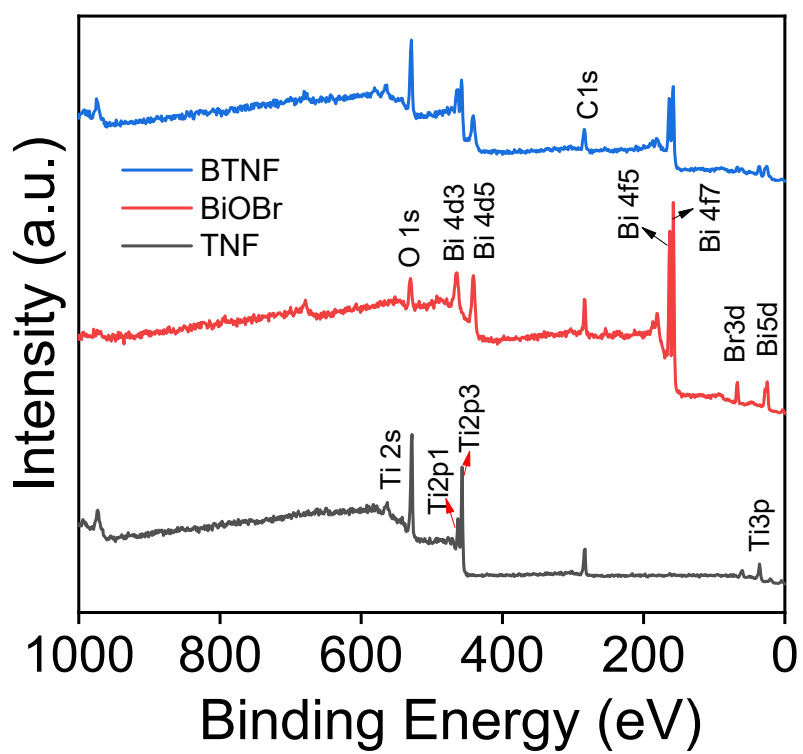

**Fig. S8** XPS survey spectrum of TNF, BiOBr, and BTNF.

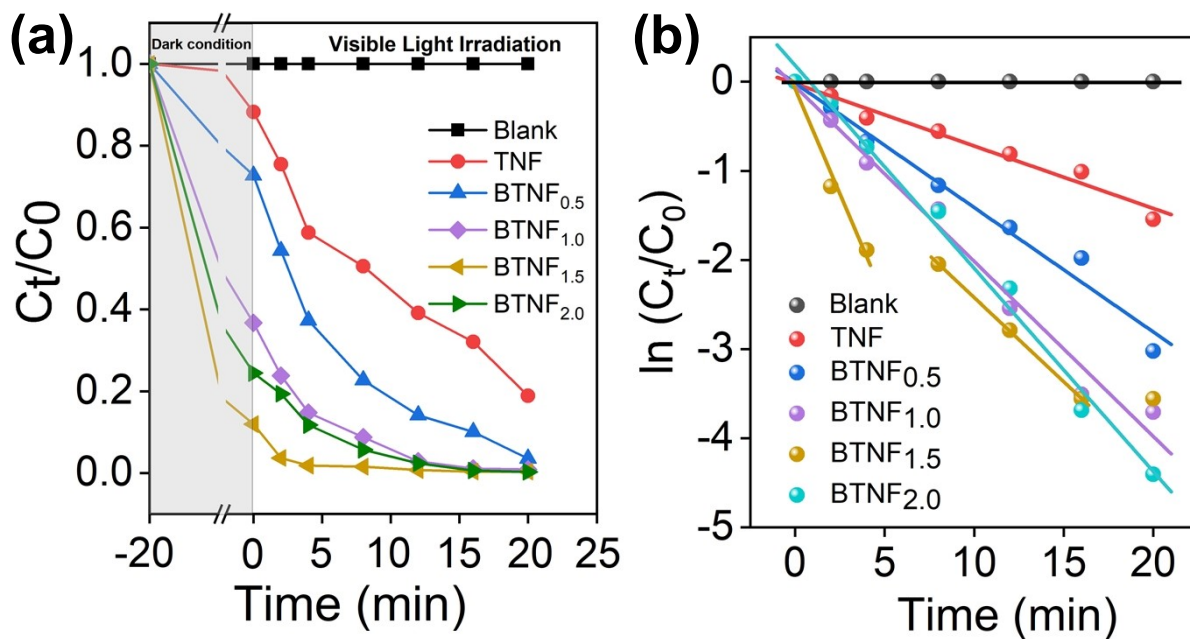

**Fig. S9** (a) Photolysis and photocatalysts dye degradation shown using the plot  $C_t/C_0$  versus time, and (b) reaction kinetic plots with different photocatalysts under the visible light irradiation

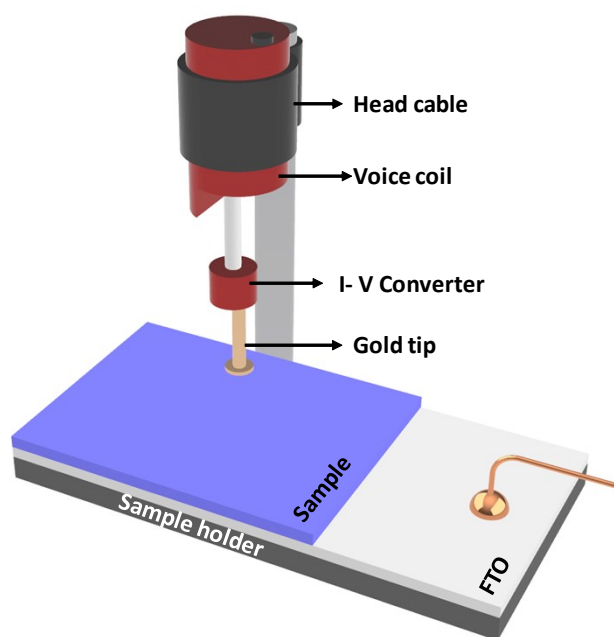

*Fig. S10* Illustration of the SKP setup.

### **Sample Preparation for SKP measurement**

For the sample preparation FTO was chosen to promote the conductivity, on which the sample was coated. Initially a slurry was prepared where  $\sim 2$  mg of the sample was taken and dissolved in 500 mL of ethanol. From it, 150  $\mu\text{L}$  of solution was taken and using spin-coating technique the sample was coated at 500 RPM for 40 sec with 3 times interval. This enabled the uniform coating of the solution on the FTO surface. Later, the coated sample was allowed for drying in ambient atmosphere and was used for SKP analysis.



**Table S3.** Comparison of photocatalytic degradation efficiency of various materials from Reported Literature

| Catalyst used and amount                                                          | Conc. and volume of RhB        | Light source                                             | Degradation time (min) | Degradation % | Reference |
|-----------------------------------------------------------------------------------|--------------------------------|----------------------------------------------------------|------------------------|---------------|-----------|
| BiOBr/TiO <sub>2</sub> Nanoheterostructure (40mg)                                 | 5 mg·L <sup>-1</sup> , 40 mL   | Metal halide lamp, 300 W( $\lambda=350 - 650\text{nm}$ ) | 8, 12                  | 98.4, 100     | This Work |
| 2D/2D BiOBr/(001)-TiO <sub>2</sub> heterojunction (40 mg)                         | 10 mg·L <sup>-1</sup> , 40 mL  | Xenon lamp, 500 W ( $\lambda=290 - 700\text{nm}$ )       | 60                     | 99            | 1         |
| BiOBr Nanoplates onto TiO <sub>2</sub> Nanorods (70 mg)                           | 15 mg·L <sup>-1</sup> , 70 mL  | Xenon lamp, 300 W ( $\lambda > 420 \text{ nm}$ )         | 10                     | 99            | 2         |
| SnO <sub>2</sub> /BiOBr Heterojunction (50 mg)                                    | 20 mg L <sup>-1</sup> , 50 mL  | 5W LED lights ( $\lambda > 400 \text{ nm}$ )             | 20                     | 98.2          | 3         |
| S-scheme In <sub>2</sub> O <sub>3</sub> /BiOBr heterojunction (100 mg)            | 10 mg·L <sup>-1</sup> , 200 mL | Xenon lamp, 300 W ( $\lambda = 290-700 \text{ nm}$ )     | 30                     | 56.6          | 4         |
| Hierarchical heterostructured BiOBr@TiO <sub>2</sub> (2 mg)                       | 10 mg L <sup>-1</sup> , 10 mL  | Xenon lamp, 300 W ( $\lambda > 420\text{nm}$ )           | 120                    | 95.5          | 5         |
| BiOBr–TiO <sub>2</sub> –graphene composite with graphene as a nano-filler (25 mg) | 10 mg·L <sup>-1</sup> , 100 mL | Xenon lamp, 300 W ( $\lambda > 400 \text{ nm}$ )         | 12                     | 100           | 6         |
| BiOBr nanosheets@TiO <sub>2</sub> nanobelts (50mg)                                | 20 mg·L <sup>-1</sup> , 50 mL  | Xenon lamp, 300 W ( $\lambda=420 \text{ nm}$ )           | 40                     | 92.8          | 7         |
| TiO <sub>2</sub> - Au-BiOBr Z-scheme system (4mg)                                 | 25 mg·L <sup>-1</sup> , 20 mL  | Xenon lamp, 300 W ( $\lambda=290 -$                      | 30                     | 99.9          | 8         |

|                                                                |                                |                                              |    |     |    |
|----------------------------------------------------------------|--------------------------------|----------------------------------------------|----|-----|----|
| Hybrid BiOBr–TiO <sub>2</sub> nanocomposites (25 mg)           | 10 mg·L <sup>-1</sup> , 100 mL | 700nm)<br>Xenon lamp,<br>300 W<br>(λ>400 nm) | 20 | 100 | 9  |
| p-BiOBr/n-TiO <sub>2</sub> hierarchical nanostructures (100mg) | 10 mg·L <sup>-1</sup> , 100 mL | Xenon lamp<br>150 W<br>(λ>400 nm)            | 20 | 76  | 10 |

---

## References

- 1 L. Yang, J. Chen, X. Liu, M. Que, Y. Zhao, H. Zheng, T. Yang, Z. Liu, Y. Li and X. Yang, *J. Alloys Compd.*, 2021, **884**, 161064.
- 2 C. Xue, T. Zhang, S. Ding, J. Wei and G. Yang, *ACS Appl. Mater. Interfaces*, 2017, **9**, 16091–16102.
- 3 H. Liu, C. Du, M. Li, S. Zhang, H. Bai, L. Yang and S. Zhang, *ACS Appl. Mater. Interfaces*, 2018, **10**, 28686–28694.
- 4 T. Xian, H. Li, X. Sun, Y. Huo, L. Di, C. Sun and H. Yang, *ACS Appl. Nano Mater.*, 2022, **5**, 15260–15271.
- 5 Y. Cai, J. Song, X. Liu, X. Yin, X. Li, J. Yu and B. Ding, *Environ. Sci. Nano*, 2018, **5**, 2631–2640.
- 6 X. X. Wei, C. M. Chen, S. Q. Guo, F. Guo, X. M. Li, X. X. Wang, H. T. Cui, L. F. Zhao and W. Li, *J. Mater. Chem. A*, 2014, **2**, 4667–4675.
- 7 Y. Zhao, X. Huang, X. Tan, T. Yu, X. Li, L. Yang and S. Wang, *Appl. Surf. Sci.*, 2016, **365**, 209–217.
- 8 X. Yu, H. Qiu, B. Wang, Q. Meng, S. Sun, Y. Tang and K. Zhao, *J. Alloys Compd.*, 2020, **839**, 155597.
- 9 X. X. Wei, H. Cui, S. Guo, L. Zhao and W. Li, *J. Hazard. Mater.*, 2013, **263**, 650–658.
- 10 K. Wang, Y. Zhang, L. Liu, N. Lu and Z. Zhang, *J. Mater. Sci.*, 2019, **54**, 8426–8435.
